# Supplementary material for: An enhanced fluorescence detection of a nitroaromatic compound using bacteria embedded in porous poly lactic-co-glycolic acid microbeads
Source: Royal Society of Chemistry journal article supplement (doi:10.1039/d1an00510c), 2021-01-01
Supplement: d1an00510c1.pdf [file d1an00510c1.pdf]

# Enhanced fluorescence detection of nitroaromatic compound using bacteria embedded in porous poly lactic-co-glycolic acid microbeads

Tian Qiao<sup>a</sup>, Soohyun Kim<sup>a</sup>, Wonmok Lee<sup>b\*</sup>, and Hyunjung Lee<sup>a,\*</sup>

<sup>a</sup> Department of Materials Science and Engineering, Kookmin Univ. 77 Jeongneung-ro,  
Seongbuk-gu, Seoul, 02707, Republic of Korea

<sup>b</sup> Department of Chemistry, Sejong Univ., Neungdong-ro 209, Gwangjin-gu, Seoul,  
143747, Republic of Korea

\* Corresponding authors.

*Email address:* [hyunjung@kookmin.ac.kr](mailto:hyunjung@kookmin.ac.kr)(H.Lee), [wonmoklee@sejong.ac.kr](mailto:wonmoklee@sejong.ac.kr)(W.Lee)

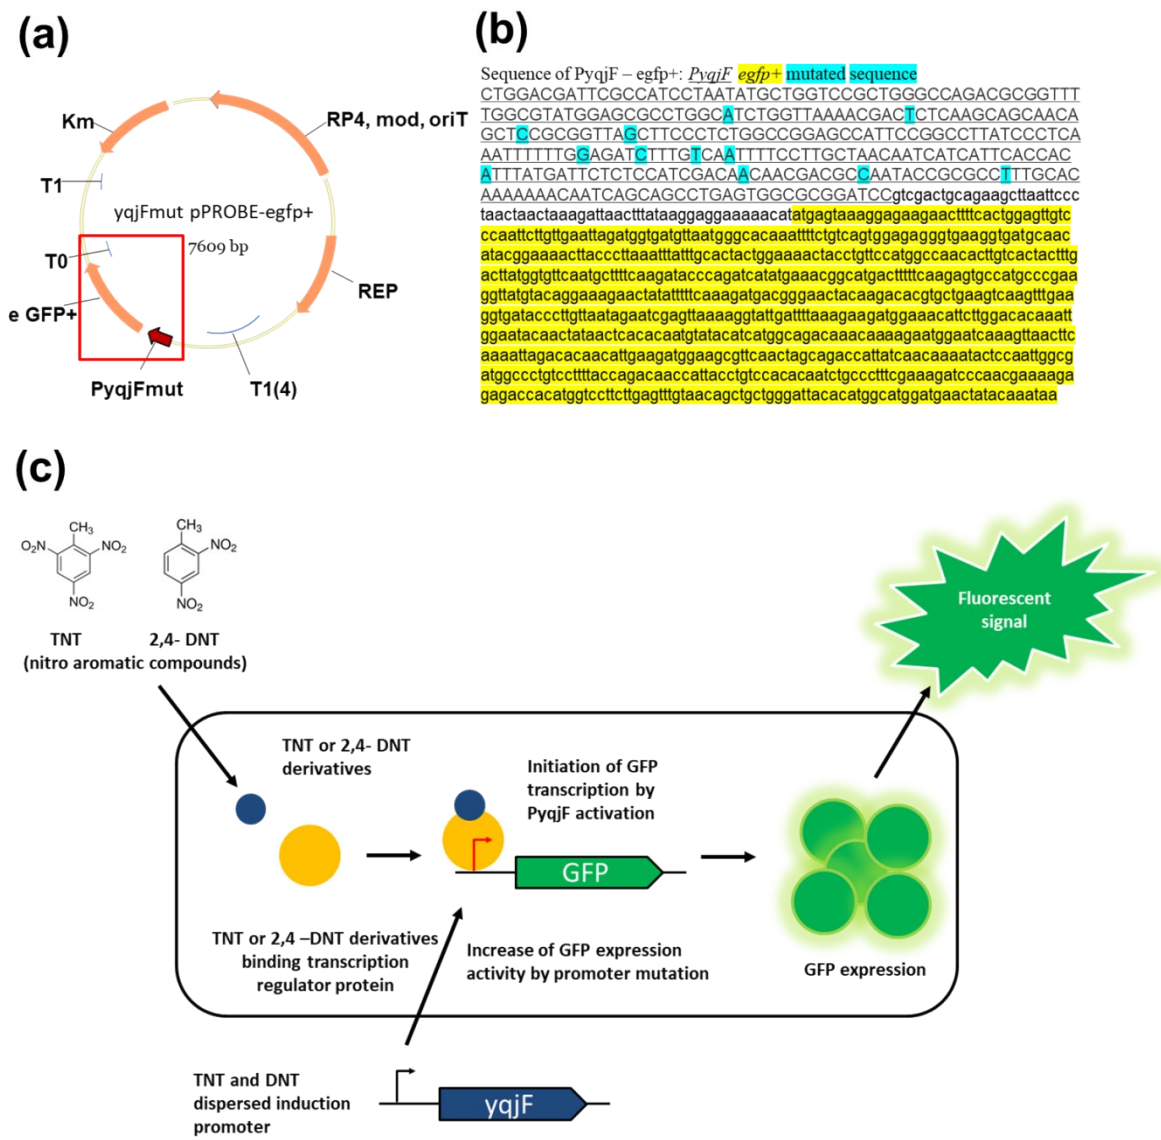

**Fig. S1.** The structure of genetically engineered plasmid and mutated sequence information ( a) Structure of the plasmid of nitroaromatic sensitive bacteria (*E. coli* MG1655 with pPROBE -*P<sub>yqjFmut</sub>-gfp+* ) (b) Sequence of *PyqjF* - *egfp+* (including mutated sequence) (c) Sensing mechanism of nitro aromatic compound inducible promoter-based biosensor

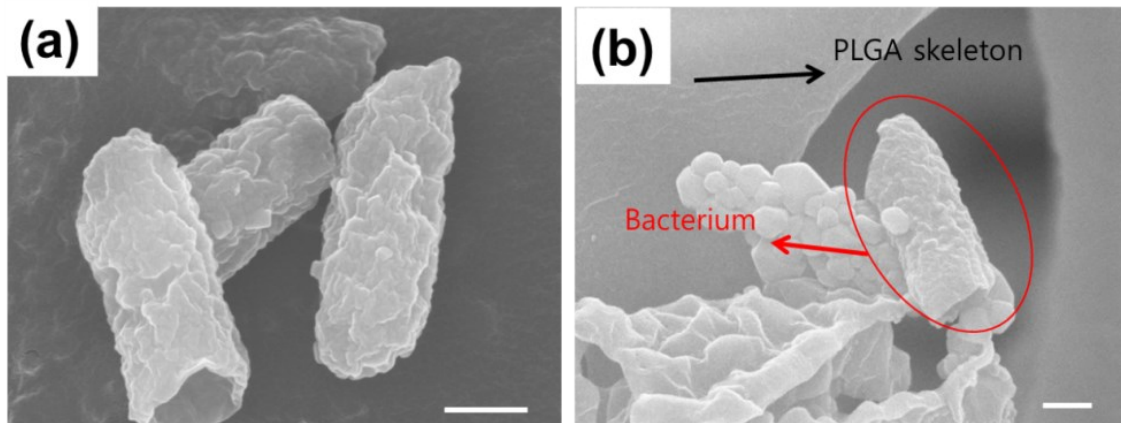

**Fig. S2.** SEM images to show morphology of fluorescent bacteria (a) and SEM images to show existence of fluorescent bacteria on PLGA skeleton (b). Scale bars represent 500 nm

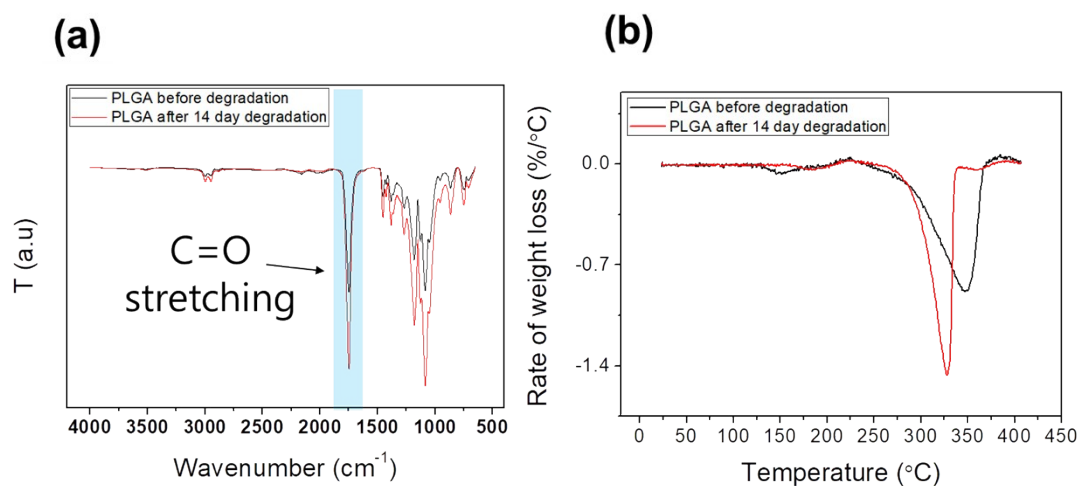

**Fig. S3.** The degradation behavior of open porous PLGA microbeads in PBS.

(a) The FTIR spectra of porous PLGA microbeads before and after 14 day degradation. (b) The derivative of TGA curves of open porous PLGA microbeads before and after 14 day degradation.

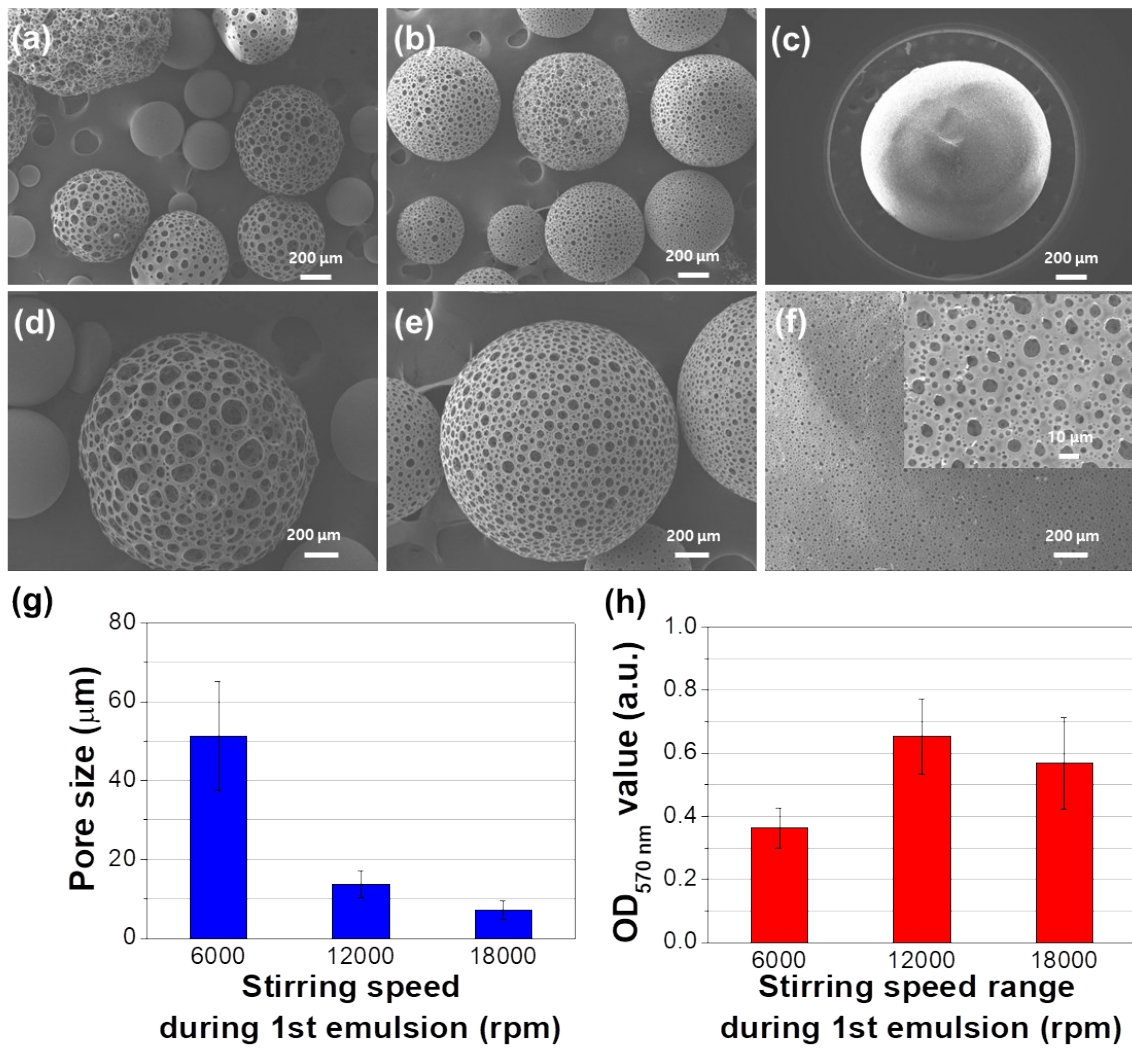

**Fig. S4.** The different morphology and bacteria adhesion property of PLGA microbeads as a function of the 1<sup>st</sup> stirring rpm.

The morphology of PLGA microbeads with 6000 1<sup>st</sup> rpm (a) ,12000 1<sup>st</sup> rpm (b) and 18000 1<sup>st</sup> rpm (c), respectively. And (d),(e)and (f) are the relatively high magnification image of (a),(b) and (c), respectively.(g) is the average pore size of porous PLGA microbeads as a function of stirring speed during 1<sup>st</sup> emulsion. (h) The OD<sub>570nm</sub> value of PLGA microbeads after bacteria incubation as a function of stirring speed during 1<sup>st</sup> emulsion.

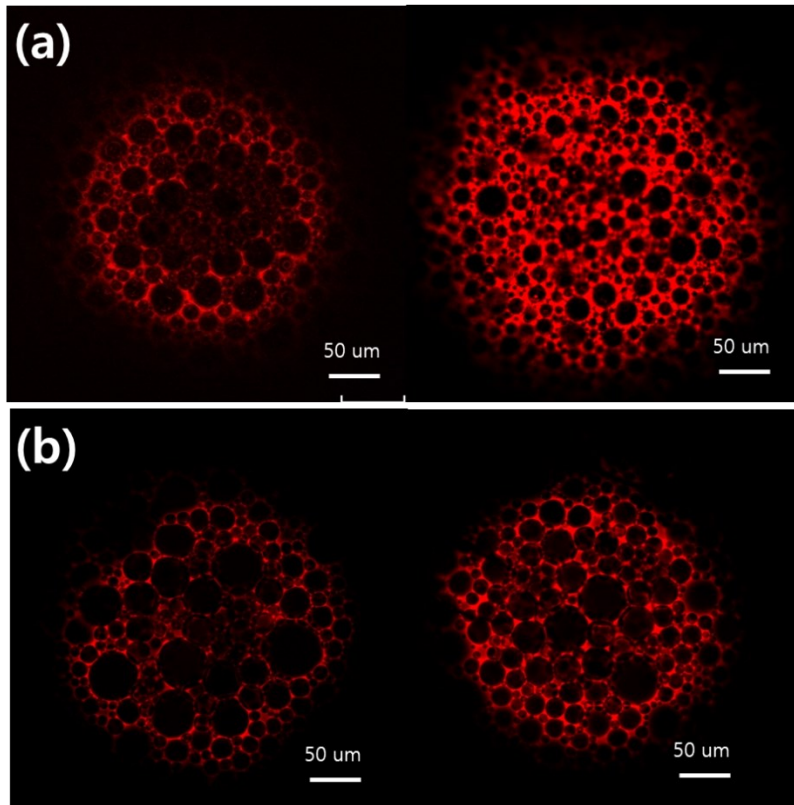

**Fig. S5.** The CLSM morphology of the cross-section of PLGA microbeads with W/O ratio= 1:3.5 (a) and W/O ratio= 1:2 (b). Rhodamine B was used as the dry for CLSM and the excitation filter and emission filter was set up as 540 nm and 580 nm.

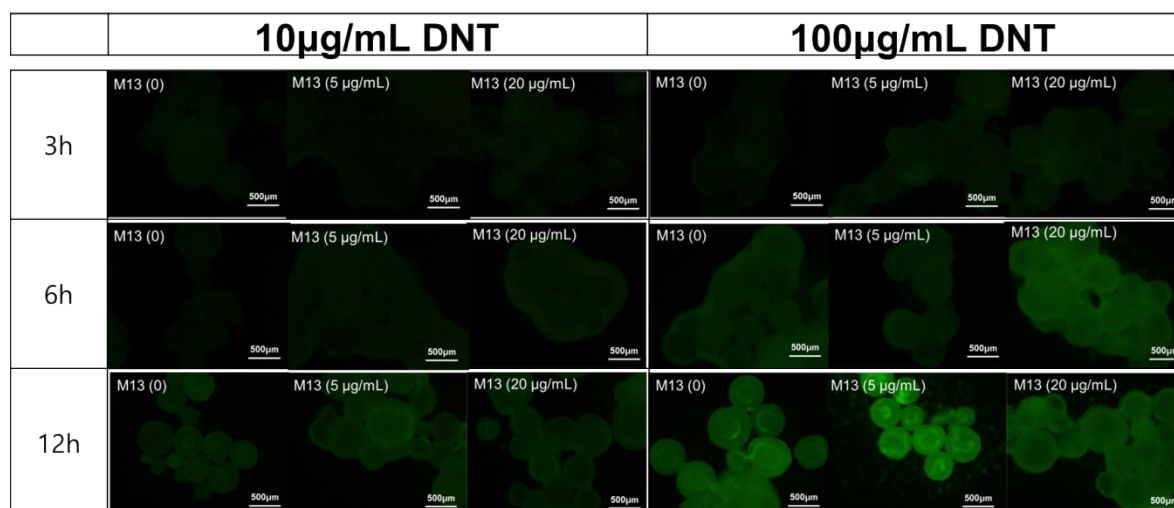

**Fig. S6.** Fluorescence mode OM images of open porous PLGA microbeads attached with nitroaromatic sensitive bacteria with 5  $\mu\text{g}/\text{mL}$ , 20  $\mu\text{g}/\text{mL}$  and without M13 bacteriophage in DNT solution.
